# Supplementary material
Source: publisher figshare collection journal article supplement (https://acs.figshare.com/ndownloader/files/25878121)
Supplement: Supplementary file 1 [file 25878121]

**Supporting information for**

**Determining the Aggregation Kinetics of Nanoparticles by Single Nanoparticle  
Counting**

Di Jiang<sup>†</sup>, Hai-Bo Chen<sup>†</sup>, Chen Qian, Xiao-Li Zhou, and Xian-Wei Liu\*

CAS Key Laboratory of Urban Pollutant Conversion, Department of Environmental  
Science and Engineering, University of Science & Technology of China, Hefei 230026,  
China

<sup>†</sup>These authors contributed equally to this work.

\*Corresponding author E-mail: [xianweiliu@ustc.edu.cn](mailto:xianweiliu@ustc.edu.cn)

## **Contents**

### **Supplementary Figures**

Figure S1: Morphology of TiO<sub>2</sub> nanoparticles and characterization of zeta potential.

Figure S2: The changes in plasmonic intensity of TiO<sub>2</sub> nanoparticles with varied NaCl concentrations.

Figure S3: The changes in plasmonic intensity of TiO<sub>2</sub> nanoparticles with varied CaCl<sub>2</sub> concentrations.

Figure S4: The calibration curve for deconvolving the plasmonic intensity distribution of the aggregates.

Figure S5: The probabilities of the number of TiO<sub>2</sub> nanoparticles in the aggregates in NaCl solutions with varied concentrations.

Figure S6: The probabilities of the number of TiO<sub>2</sub> nanoparticles in the aggregates in CaCl<sub>2</sub> solutions with varied concentrations.

Figure S7: Typical plasmonic images of TiO<sub>2</sub> nanoparticles during aggregation in 300 mM NaCl solution at different times.

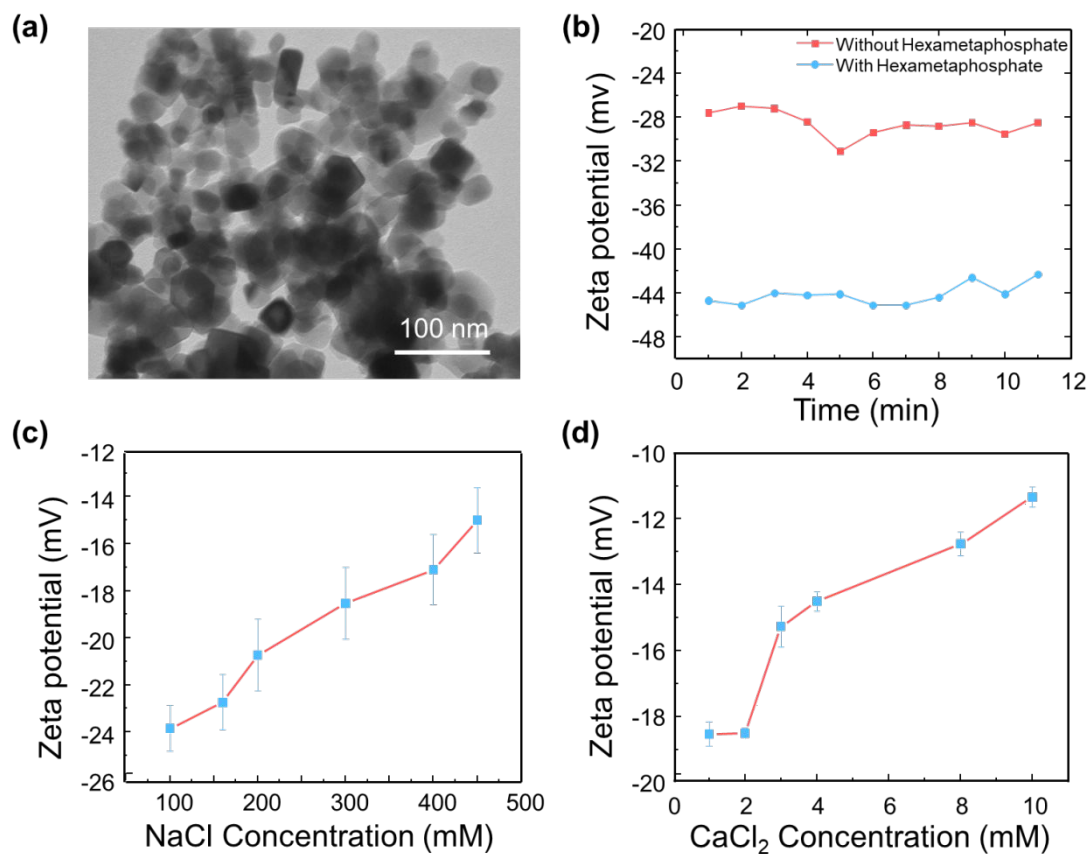

**Figure S1.** (a) TEM micrograph of the TiO<sub>2</sub> NPs. (b) Zeta potential of TiO<sub>2</sub> NPs with and without hexametaphosphate in water. Zeta potentials of TiO<sub>2</sub> NPs as a function of (c) NaCl and (d) CaCl<sub>2</sub> concentrations. Each point was the average of triplicate measurements and the error bars represent standard deviations.

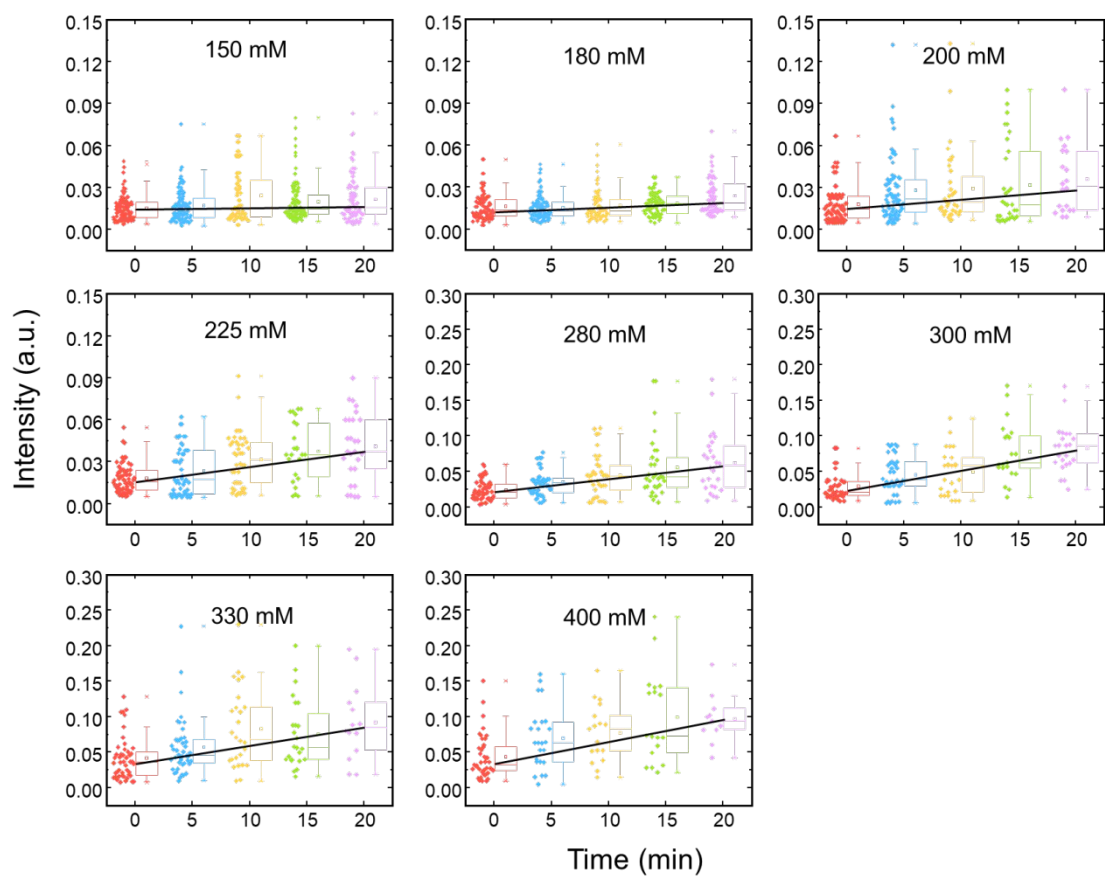

**Figure S2.** Plasmonic intensity of  $\text{TiO}_2$  nanoparticles changes as a function of time with varied NaCl concentrations. The black lines represent the fitting line of the median values of the plasmonic intensities of the particles at different times.

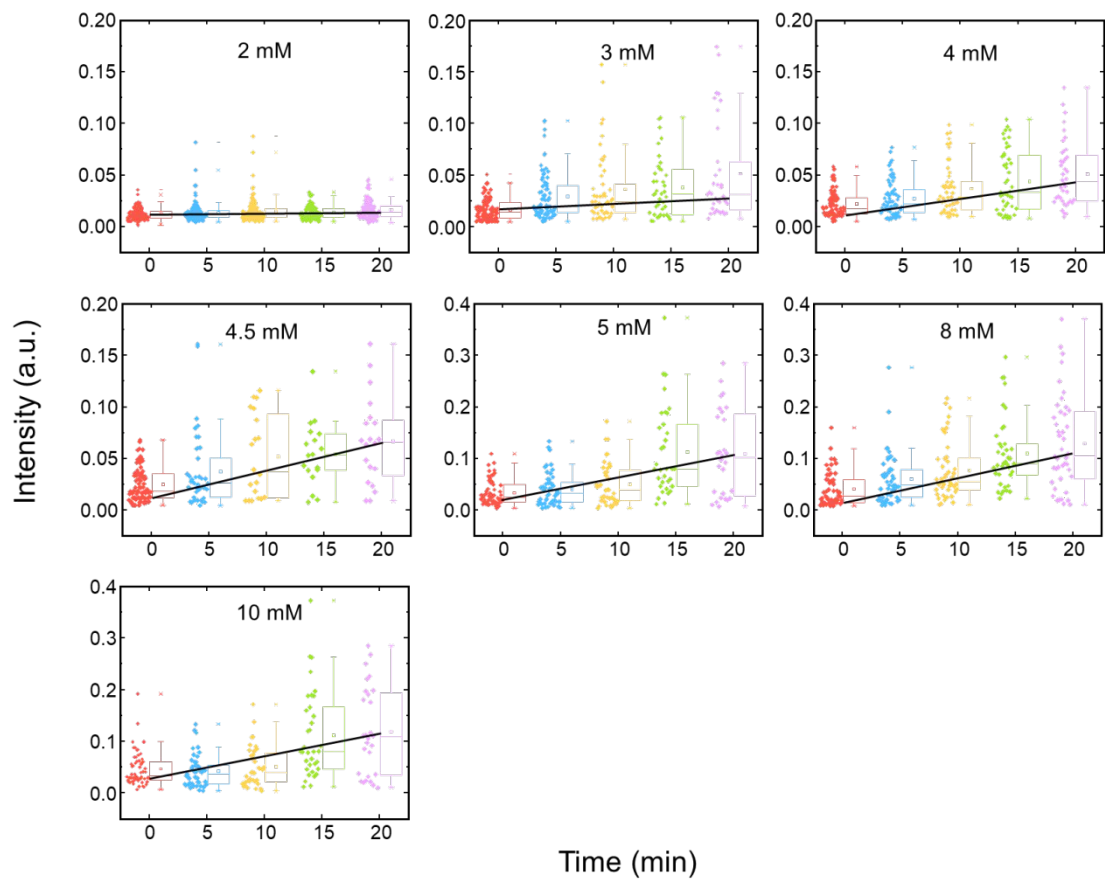

**Figure S3.** Plasmonic intensity of  $\text{TiO}_2$  nanoparticles changes as a function of time with varied  $\text{CaCl}_2$  concentrations. The black lines represent the fitting line of the median values of the plasmonic intensities of the particles at different times.

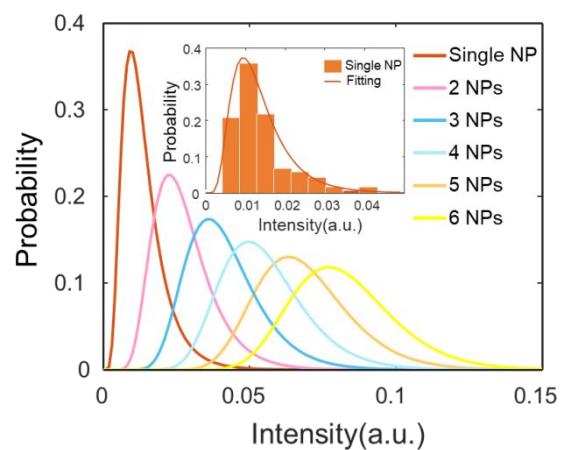

**Figure S4.** The calibration curve for deconvolving the plasmonic intensity distribution of the aggregates. The standard intensity distribution of the aggregates ( $N = 1$  to 6) was used to estimate the number of nanoparticles in the aggregates. The inset is the plasmonic intensity distribution and lognormal fitting of the single nanoparticles.

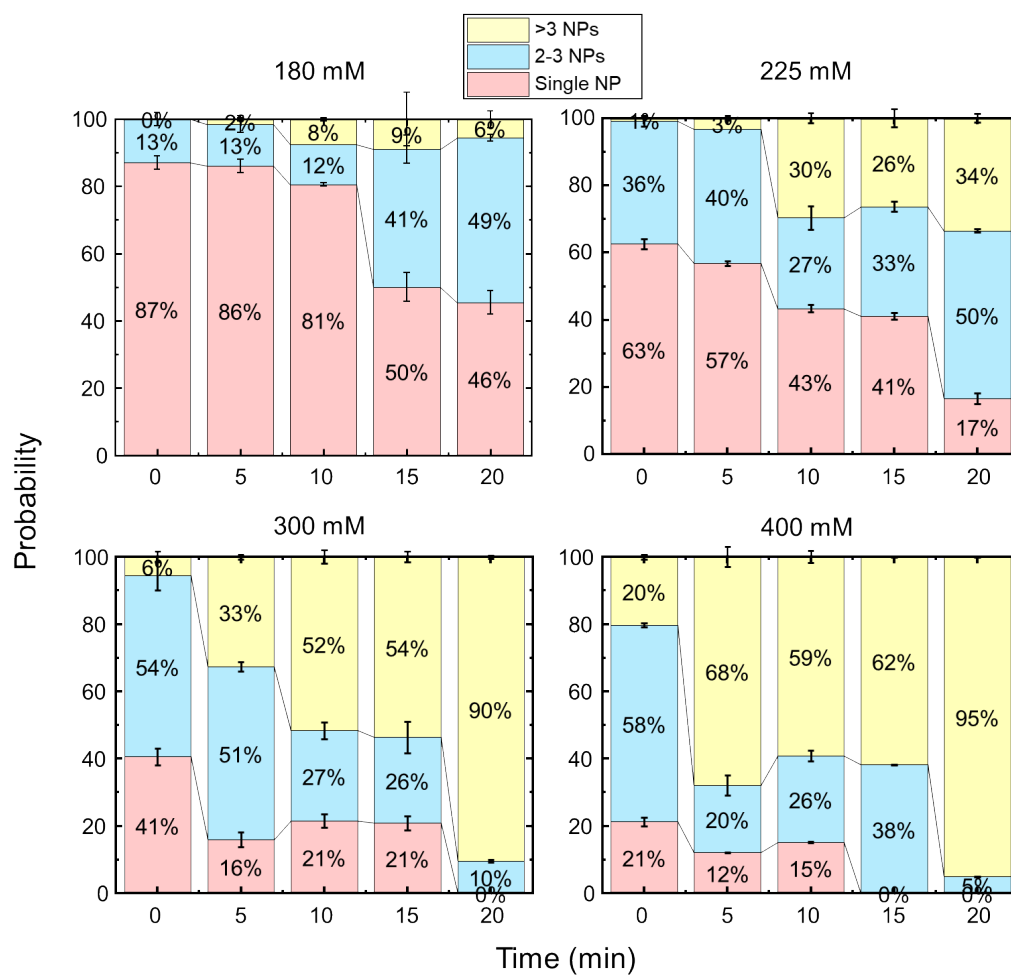

**Figure S5.** The probabilities of the number of TiO<sub>2</sub> nanoparticles in the aggregates in NaCl solutions with varied concentrations.

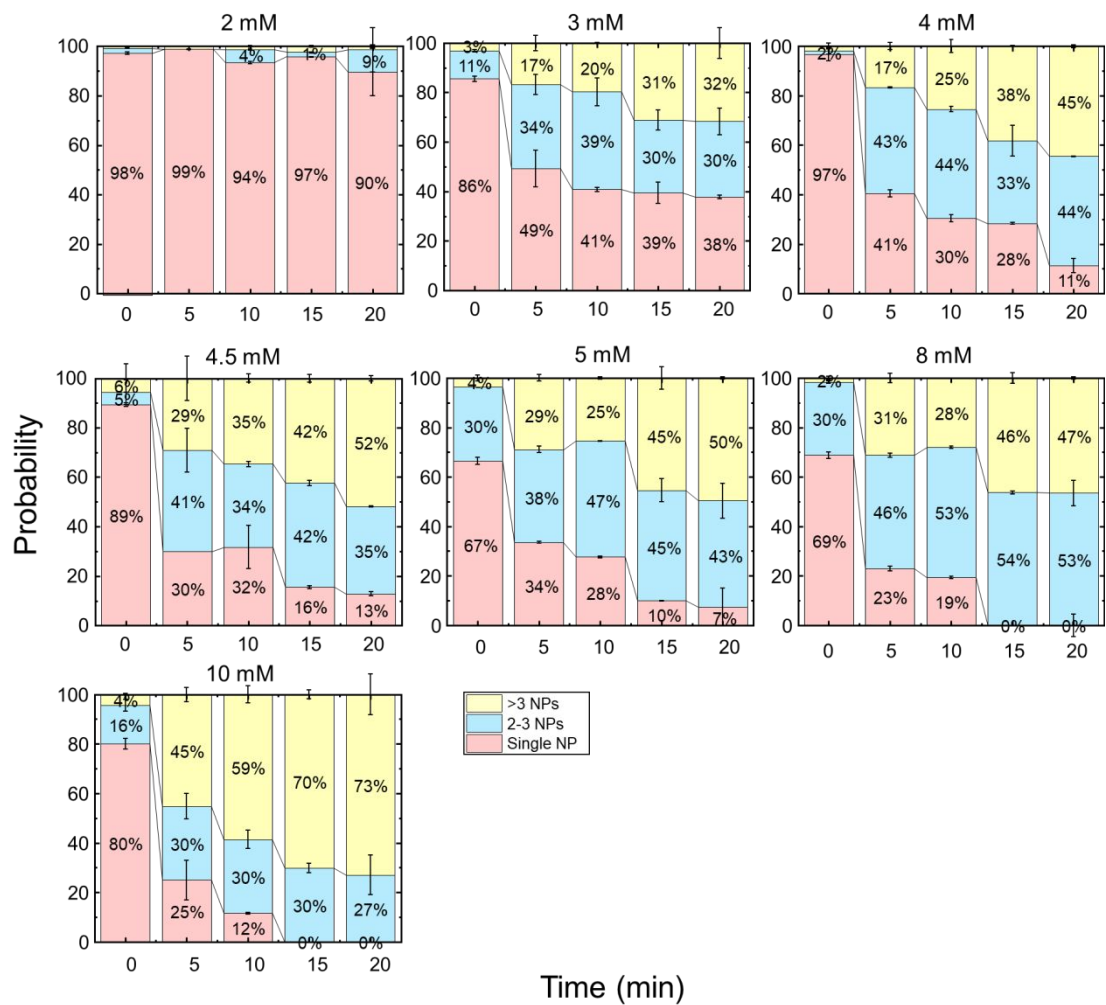

**Figure S6.** The probabilities of the number of  $\text{TiO}_2$  nanoparticles in the aggregates in  $\text{CaCl}_2$  solutions with varied concentrations.



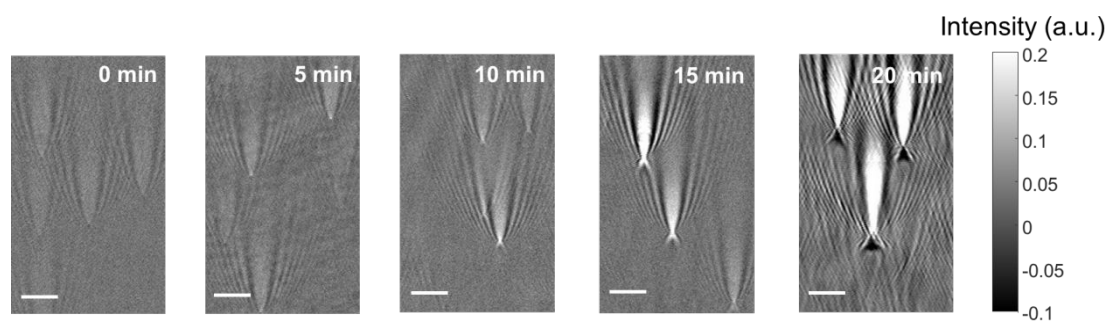

**Figure S7.** Typical plasmonic images of TiO<sub>2</sub> nanoparticles during aggregation in 300 mM NaCl solution at different times. Each TiO<sub>2</sub> nanoparticle appears as a parabolic-tailed pattern, whose center represents the location of the nanoparticle. Scale bar: 5  $\mu\text{m}$ .
